# Supplementary material
Source: publisher site journal article supplement (https://www.dovepress.com/article/349760)
Supplement: Supplementary file 1 [file get_supplementary_file.php]

**Translation, Cultural Adaptation and Validation of the Hill Bone Compliance to High Blood Pressure Therapy Scale to Nepalese Language**

**Appendix 1a.HBCTS (English Version)**

| S.N. | **Items** |
| --- | --- |
| 1 | How often do you forget to take your HBP medicine? |
| 2 | How often do you decide NOT to take your HBP medicine? |
| 3 | How often do you eat salty food? |
| 4 | How often do you add salt to your food before you eat it? |
| 5 | How often do you eat fast food? |
| 6 | How often do you make the next appointment before you leave the doctor’s office?* |
| 7 | How often do you miss scheduled appointments? |
| 8 | How often do you forget to get prescriptions filled? |
| 9 | How often do you run out of HBP pills? |
| 10 | How often do you skip your HBP medicine before you go to the doctor? |
| 11 | How often do you miss taking your HBP pills when you feel better? |
| 12 | How often do you miss taking your HBP pills when you feel sick? |
| 13 | How often do you take someone else’s HBP pills? |
| 14 | How often do you miss taking your HBP pills when you are careless? |
| *reverse score | |
| Response  1. Never  2. Sometimes  3. Most of the time  4. All of the time | |

**Appendix 1b.HBCTS (Nepalese Version)**

| क्र स | **प्रश्नहरु** |
| --- | --- |
| १ | तपाईँ आफ्नो उच्च रक्तचाप (प्रेसर) को औषधि खान कत्तिको बिर्सनु हुन्छ ? |
| २ | तपाईँ आफू स्वयम् ले आफ्नो उच्च रक्तचाप (प्रेसर) को औषधि नखाने निर्णय कत्तिको लिनु हुन्छ ? |
| ३ | तपाईँ नुन चर्को वा बढी भएको खाना कत्तिको खानु हुन्छ? |
| ४ | तपाईँले खाना खानु अगाडीकत्तिको नुन थप्नु हुन्छ? |
| ५ | तपाईँ त्तयारी खाना(जस्तै:चाउचाउ, चाउमिन, भुजिया,पापड, दालमोठ)कत्तिको खानुहुन्छ? |
| ६ | तपाईँ डाक्टरलाई भेटेपछि फेरी अर्को पटक भेट्नको लागि समय तय कत्तिको गर्नु हुन्छ ?* |
| ७ | तपाईँको डाक्टरसँग भेट्नुपर्ने समय कत्तिको छुट्ने गर्छ? |
| ८ | तपाईँले औषधी पसल बाट आफ्नो उच्च रक्तचाप प्रेसरको औषधि ल्याउन कत्तिको बिर्सनु हुन्छ? |
| ९ | तपाईँको औषधि सकिएर सेवन गर्न छुटेको अवस्था कत्तिको हुन्छ ? |
| १० | तपाईँले डाक्टरकोमा जानु अगाडी आफ्नो उच्च रक्तचाप(प्रेसर) को औषधि नखाइ कत्तिको जानु हुन्छ? |
| ११ | तपाईँले आफ्नो उच्च रक्तचाप(प्रेसर)को नियन्त्रण सुधार भएको महसुस गर्दा औषधि खान कत्तिकोछुटाउनुहुन्छ? |
| १२ | तपाईँ आफूलाई बिसन्चो भएको महसुस गर्दाउच्च रक्तचाप (प्रेसर) को औषधि खान कत्तिको छुटाउनुहुज्छ? |
| १३ | तपाई अरुको उच्च रक्तचाप (प्रेसर) को औषधी कत्तिको खानुहुन्छ? |
| १४ | तपाईँ आफ्नो लापरवाहीले गर्दा उच्च रक्तचाप(प्रेसर) को औषधि खान कत्तिको छुटाउनुहुन्छ? |
| * विपरित स्कोर गर्ने | |
| प्रतिक्रिया  १. कहिले पनि हुँदैन  २. कहिले काहीँ  ३. प्राय जसो  ४. जहिले पनि | |

**Notes:** Reproduced and translated with permission from Johns Hopkins University School of Nursing, Hill-Bone Scale Team.1,2,3

**Appendix 2.Scores and distribution of answers in Nepalese version of the HBCTS (n =282)**

| Questions | Mean SD | Never  n(%) | Sometimes  n(%) | Most of the time  n (%) | All of the time  n(%) |
| --- | --- | --- | --- | --- | --- |
| **Medicine Taking** | **10.63±2.55** |  |  |  |  |
| 1. How often do you forget to take your HBP medicine? | 1.33±0.50 | 191 (67.7) | 87(30.9) | 4(1.4) | 0 (0.0) |
| 2. How often do you decide NOT to take your HBP medicine? | 1.28±0.54 | 215 (76.2) | 56(19.9) | 10(3.5) | 1 (0.4) |
| 8. How often do you forget to get prescriptions filled? | 1.18±0.45 | 236 (83.7) | 39(13.8) | 7(2.5) | 0(0.0) |
| 9. How often do you run out of HBP pills? | 1.22±0.47 | 226 (80.1) | 49(17.4) | 7(2.5) | 0(0.0) |
| 10. How often do you skip your HBP medicine before you go to the doctor? | 1.09±0.28 | 256(90.8) | 26(9.2) | 0(0.0) | 0(0.0) |
| 11. How often do you miss taking your HBP pills when you feel better? | 1.19±0.44 | 231(81.9) | 46(16.3) | 5(1.8) | 0(0.0) |
| 12. How often do you miss taking your HBP pills when you feel sick? | 1.15±0.38 | 242(85.8) | 37(13.1) | 3(1.1) | 0(0.0) |
| 13. How often do you take someone else’s HBP pills? | 1.04±0.24 | 271(96.1) | 9(3.2) | 2(0.7) | 0(0.0) |
| 14. How often do you miss taking your HBP pills when you are careless? | 1.11±0.33 | 252(89.4) | 28(9.9) | 2(0.7) | 0(0.0) |
| **Reduced salt intake** | **4.16±1.12** |  |  |  |  |
| 3. How often do you eat salty food? | 1.27±0.52 | 214(75.9) | 59(20.9) | 8(2.8) | 1(0.4) |
| 4. How often do you add salt to your food before you eat it? | 1.21±0.45 | 226(80.1) | 51(18.1) | 5(1.8) | 0(0.0) |
| 5. How often do you eat fast food? | 1.67±0.60 | 112(39.7) | 152(53.9) | 17(6.0) | 1(0.4) |
| **Appointment keeping** | **3.06±1.07** |  |  |  |  |
| 6. How often do you make the next appointment before you leave the doctor’s office? | 1.55±0.67 | 154(54.6) | 99(35.1) | 29(10.3) | 0(0.0) |
| 7. How often do you miss scheduled appointments? | 1.50±0.57 | 150(53.2) | 121(42.9) | 11(3.9) | 0(0.0) |
| **Overall treatment adherence score** | **17.85±3.87** | | | | |
| **HBP: High blood pressure** |  | | | | |

| **Appendix 3. Correlation Matrixa** | | | | | | | | | | | | | | | |
| --- | --- | --- | --- | --- | --- | --- | --- | --- | --- | --- | --- | --- | --- | --- | --- |
| Items | | 1 | 2 | 3 | 4 | 5 | 6 | 7 | 8 | 9 | 10 | 11 | 12 | 13 | 14 |
| Correlation | 1 | - | 0.370 | 0.171 | 0.101 | 0.109 | 0.180 | 0.146 | 0.348 | 0.401 | 0.299 | 0.307 | 0.319 | 0.253 | 0.401 |
| 2 |  | - | 0.262 | 0.259 | 0.087 | 0.302 | 0.251 | 0.366 | 0.379 | 0.401 | 0.538 | 0.556 | 0.254 | 0.445 |
| 3 |  |  | - | 0.522 | 0.131 | 0.376 | 0.217 | 0.214 | 0.207 | 0.228 | 0.252 | 0.262 | 0.290 | 0.340 |
| 4 |  |  |  | - | 0.158 | 0.420 | 0.261 | 0.323 | 0.305 | 0.335 | 0.300 | 0.297 | 0.233 | 0.418 |
| 5 |  |  |  |  | - | 0.112 | 0.187 | 0.085 | 0.184 | 0.215 | 0.206 | 0.154 | 0.276 | 0.235 |
| 6 |  |  |  |  |  | - | 0.482 | 0.264 | 0.323 | 0.301 | 0.356 | 0.286 | 0.148 | 0.361 |
| 7 |  |  |  |  |  |  | - | 0.291 | 0.342 | 0.253 | 0.233 | 0.227 | 0.139 | 0.307 |
| 8 |  |  |  |  |  |  | 1 | - | 0.604 | 0.412 | 0.366 | 0.445 | 0.182 | 0.581 |
| 9 |  |  |  |  |  |  |  |  |  | 0.524 | 0.383 | 0.395 | 0.252 | 0.551 |
| 10 |  |  |  |  |  |  |  |  |  | - | 0.551 | 0.380 | 0.295 | 0.508 |
| 11 |  |  |  |  |  |  |  |  |  |  |  | 0.652 | 0.281 | 0.537 |
| 12 |  |  |  |  |  |  |  |  |  |  |  |  | 0.266 | 0.570 |
| 13 |  |  |  |  |  |  |  |  |  |  |  |  |  | 0.327 |
| 14 |  |  |  |  |  |  |  |  |  |  |  |  |  |  |
| a. Determinant = 0.007 | | | | | | | | | | | | | | | |

**Appendix 4.Total Variance Explained**

| Component | Initial Eigenvalues | | | Extraction Sums of Squared Loadings | | | Rotation Sums of Squared Loadings | | |
| --- | --- | --- | --- | --- | --- | --- | --- | --- | --- |
| **Total** | **% of Variance** | **Cumulative %** | **Total** | **% of Variance** | **Cumulative %** | **Total** | **% of Variance** | **Cumulative %** |
| 1 | 5.276 | 37.687 | 37.687 | 5.276 | 37.687 | 37.687 | 3.960 | 28.285 | 28.285 |
| 2 | 1.345 | 9.605 | 47.292 | 1.345 | 9.605 | 47.292 | 2.326 | 16.611 | 44.896 |
| 3 | 1.106 | 7.902 | 55.194 | 1.106 | 7.902 | 55.194 | 1.442 | 10.298 | 55.194 |
| 4 | .996 | 7.111 | 62.306 |  |  |  |  |  |  |
| 5 | .890 | 6.354 | 68.659 |  |  |  |  |  |  |
| 6 | .794 | 5.672 | 74.332 |  |  |  |  |  |  |
| 7 | .647 | 4.619 | 78.951 |  |  |  |  |  |  |
| 8 | .612 | 4.374 | 83.325 |  |  |  |  |  |  |
| 9 | .497 | 3.552 | 86.878 |  |  |  |  |  |  |
| 10 | .440 | 3.145 | 90.022 |  |  |  |  |  |  |
| 11 | .421 | 3.010 | 93.032 |  |  |  |  |  |  |
| 12 | .359 | 2.563 | 95.595 |  |  |  |  |  |  |
| 13 | .340 | 2.430 | 98.025 |  |  |  |  |  |  |
| 14 | .277 | 1.975 | 100.000 |  |  |  |  |  |  |
| Extraction Method: Principal Component Analysis. | | | | | | | | | |

**References**

1. Kim MT, Hill MN, Bone LR, Levine DM. Development and testing of the Hill-Bone Compliance to High Blood Pressure Therapy Scale. P*rog Cardiovasc Nurs. Summer*. 2000;15(3):90-96.

2. Kim EY, Han HR, Jeong S, et al. Does Knowledge Matter? Intentional Medication Nonadherence Among Middle-Aged Korean Americans With High Blood Pressure. *The Journal of Cardiovascular Nursing*. 2007;22(5)397-404.

3. Lambert EV, Steyn K, Stender S Everage N, Fourie JM, HIll M. Cross-cultural validation of the hill-bone compliance to high blood pressure therapy scale in a South African, primary healthcare setting. *Ethn Dis. Winter*. 2006;16(1):286-91.
